# Supplementary material for: Generation of Orthotopic Patient-Derived Xenograft in Humanized Mice for Evaluation of Emerging Targeted Therapies and Immunotherapy Combinations for Melanoma
Source: Preprints.org preprint supplement (doi:10.20944/preprints202307.0566.v1), 2023-07-10
Supplement: Supplementary file 1 [file supplementary]

## Supplementary Material

# Generation of Orthotopic Patient-Derived Xenograft in Humanized Mice for Evaluation of Emerging Targeted Therapies and Immunotherapy Combinations for Melanoma

Chi Yan, Caroline A. Nebhan, Nabil Saleh, Rebecca Shattuck-Brandt, Sheau-Chiann Chen,

Gregory D. Ayers, Vivian Weiss, Ann Richmond\*, Anna Vilgelm\*

### \* Correspondence:

Ann Richmond, PhD, Email: [ann.richmond@vanderbilt.edu](mailto:ann.richmond@vanderbilt.edu)

Anna Vilgelm, MD, PhD, Email: [Anna.Vilgelm@osumc.edu](mailto:Anna.Vilgelm@osumc.edu)

### Supplementary figures

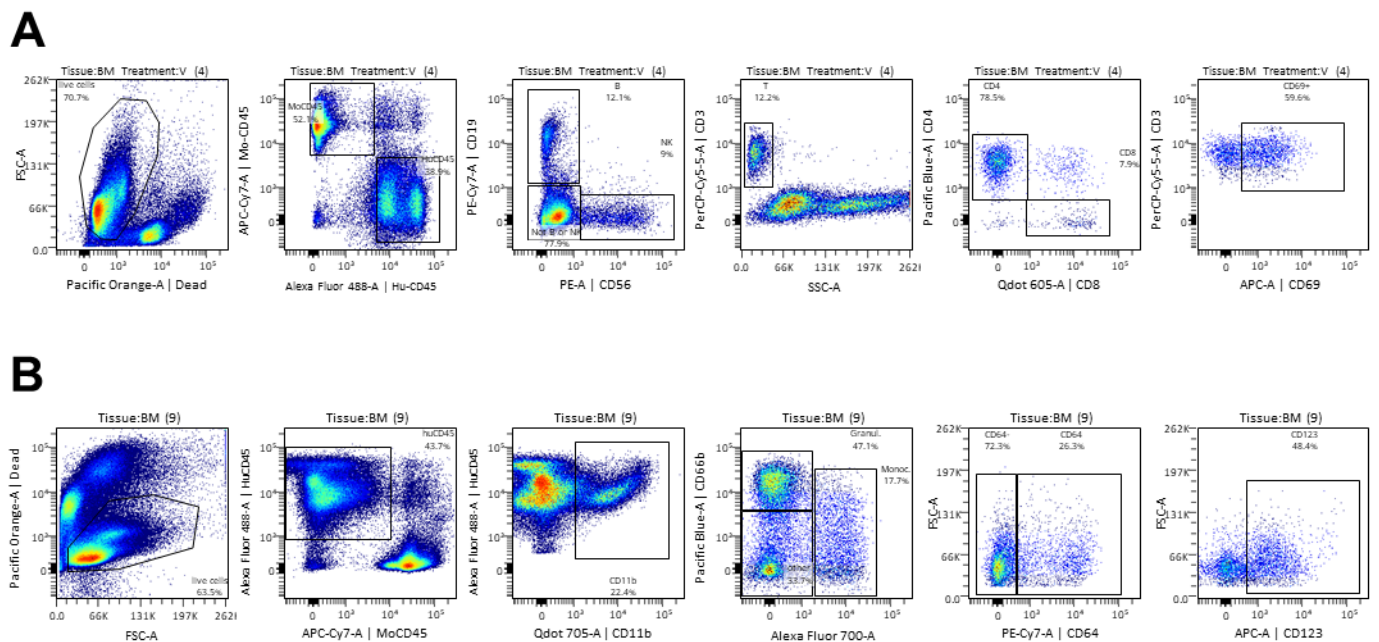

**Supplementary Figure 1. Gating strategy to identify key immune subsets in huNSGS mice. A.**

Representative cytometry plots showing lymphoid immune subsets gating in huNSGS mice. **B.** Representative cytometry plots showing myeloid immune subsets gating in huNSGS mice.

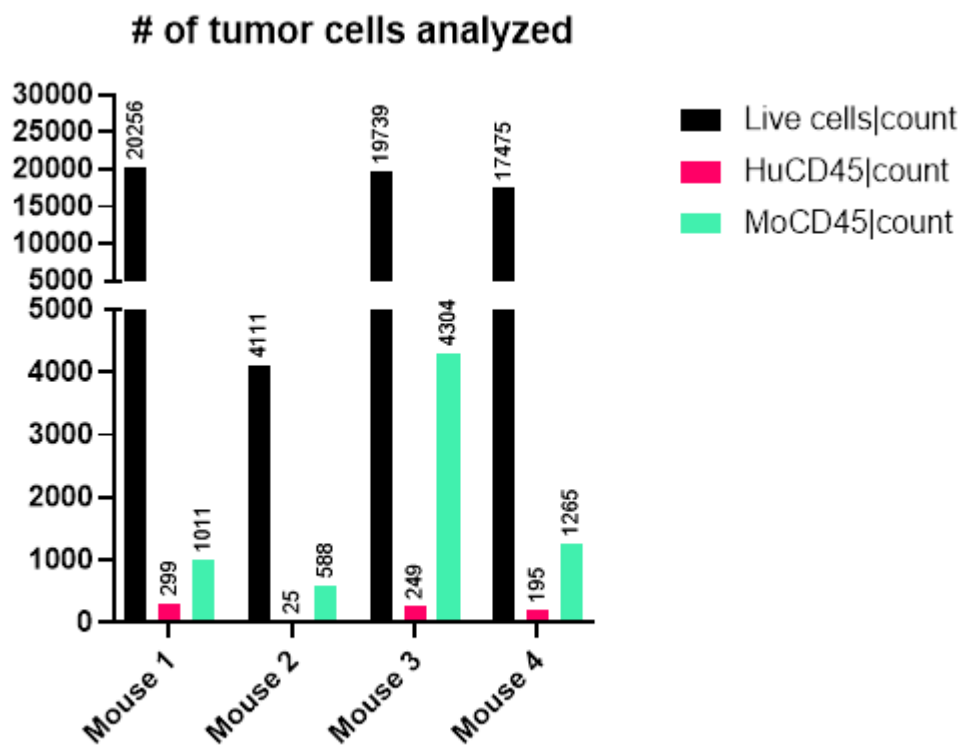

Supplementary Figure 2. Absolute numbers of live cells, human CD45 cells, and mouse CD45 cells from the flow cytometry analysis of tumors grown in huNSGS mice shown in Figures 2F and G.

**A**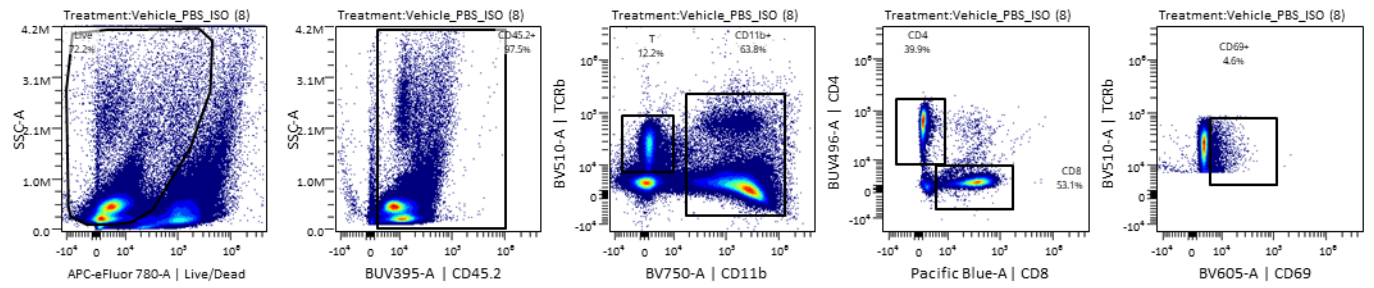**B**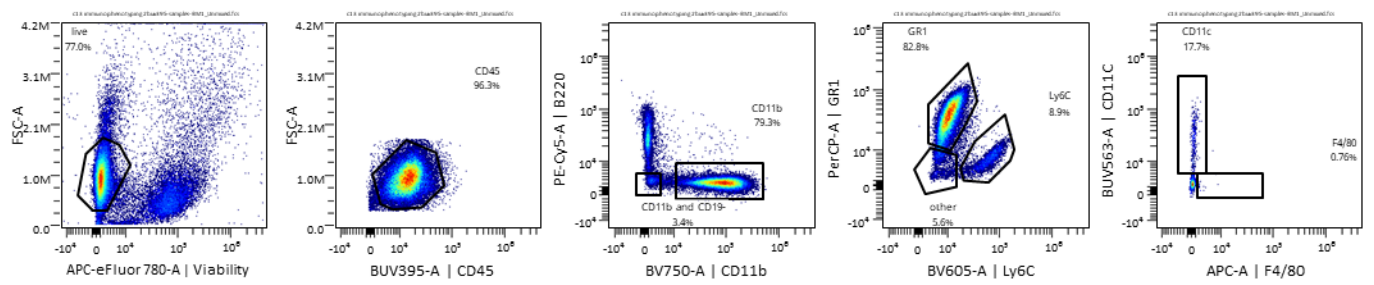

**Supplementary Figure S3. Gating strategy to identify immune cell subsets in immunocompetent mice. A.**

Representative cytometry plots showing lymphoid immune subsets gating in wild type C57Bl/6 mice. **B.**

Representative cytometry plots showing immune subsets gating in wild type Balb/C mice.

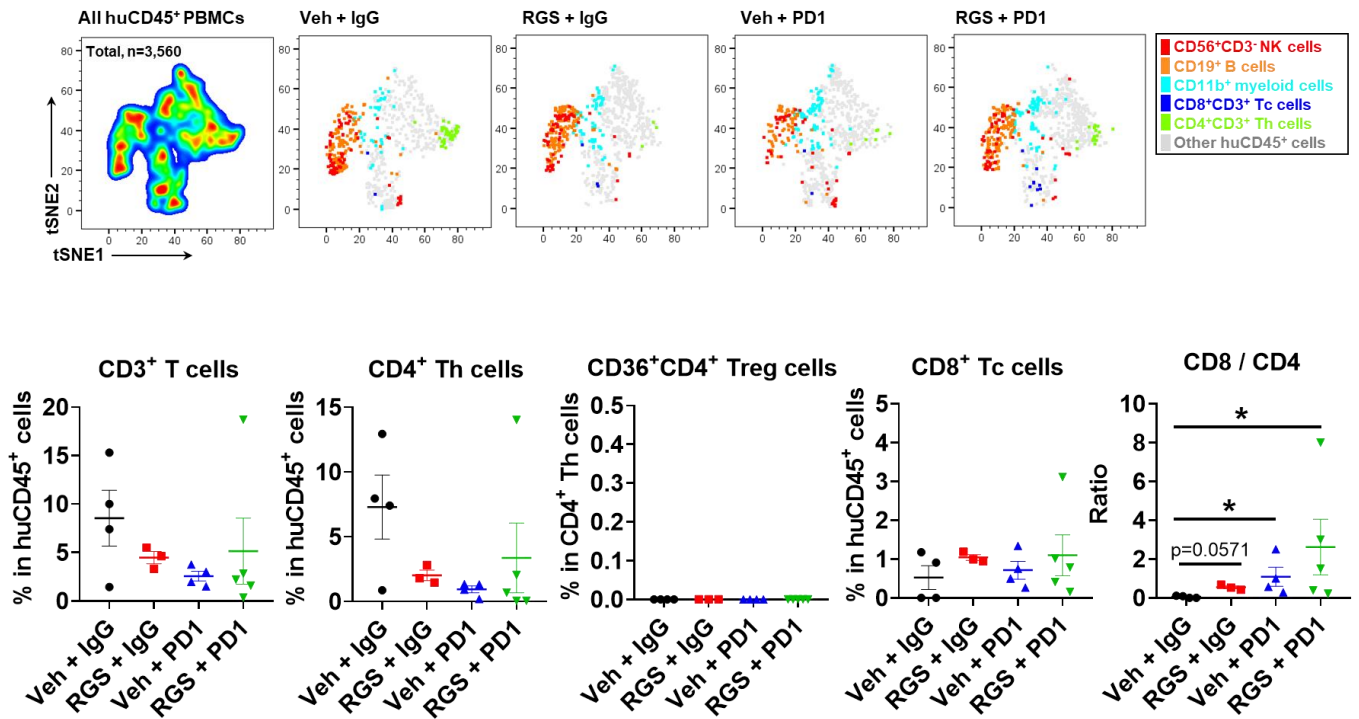

**Supplementary Figure S4. Rigosertib plus anti-PD-1 induced CD8/CD4 cell ratio in the blood of huNOG-EXL-PDX mice bearing PDX-3101 tumors.** tSNE analysis of immune profile and percentages of CD3<sup>+</sup> T cells, CD4<sup>+</sup>CD3<sup>+</sup> helper T (Th) cells, CD36<sup>+</sup>CD4<sup>+</sup>CD3<sup>+</sup> regulatory T (Treg) cells, CD8<sup>+</sup>CD3<sup>+</sup> cytotoxic T (Tc) cells, and CD8/CD4 ratio in the blood of individual humanized mice. Cells were gated on human CD45<sup>+</sup> cells.

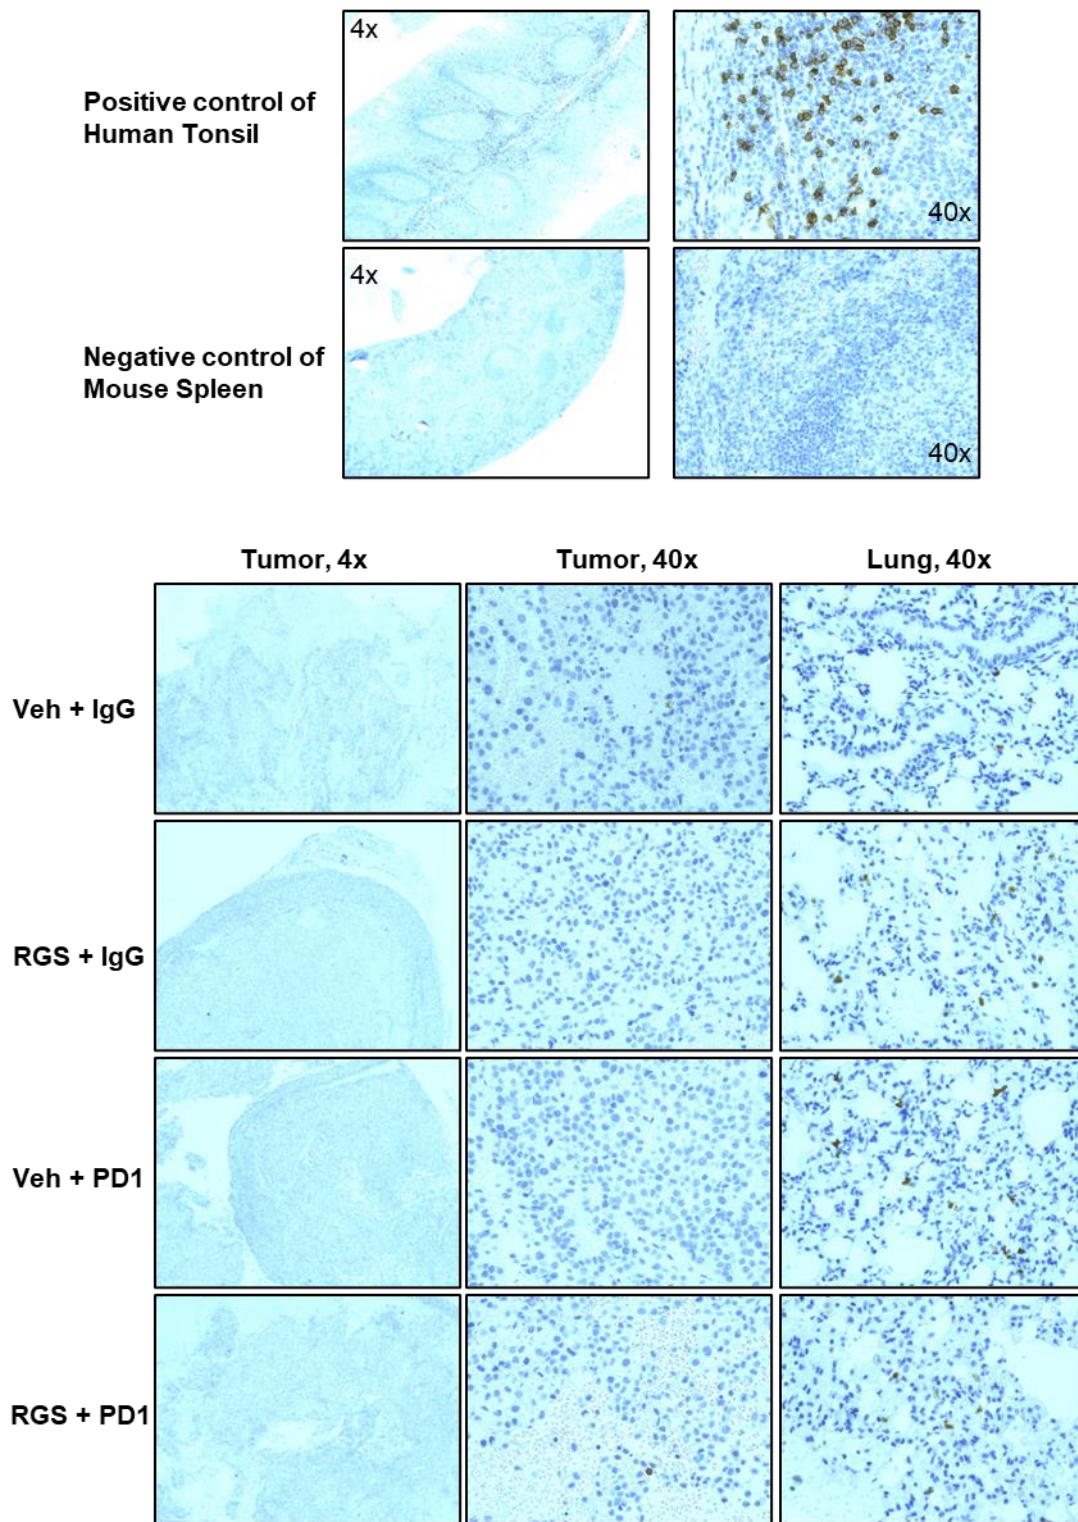

**Supplementary Figure S5. Limited CD8 cell content in the tumor of huNOG-EXL-PDX mice bearing PDX-3101.** Immunohistochemistry staining of human CD8+ cells in the indicated tissues. Results from human tonsil and mouse spleen were included as positive and negative controls, respectively.

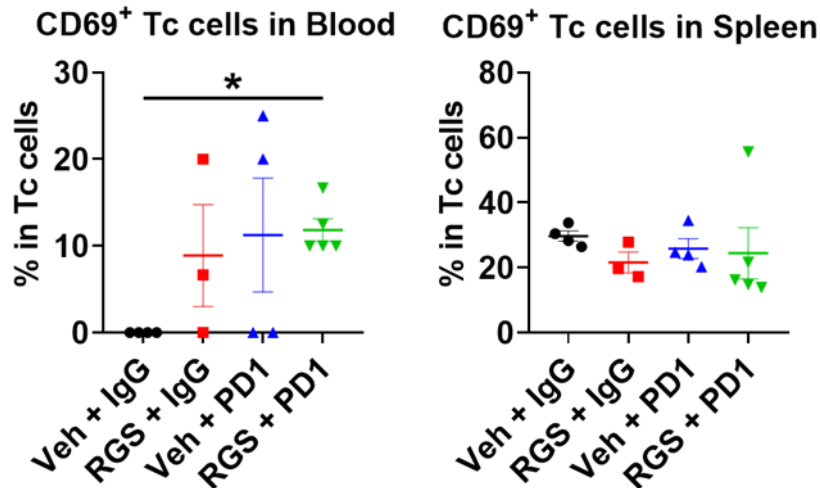

**Supplementary Figure S6. Expression of activation marker CD69 on T cells from blood and spleens of huNOG-EXL-PDX mice bearing PDX-3101 tumors.** Percentage of CD69<sup>+</sup> cells based on flow cytometry data in the blood and spleen of individual humanized mice. Cells were gated on human CD45<sup>+</sup>CD3<sup>+</sup>CD8<sup>+</sup> cytotoxic T (Tc) cells.

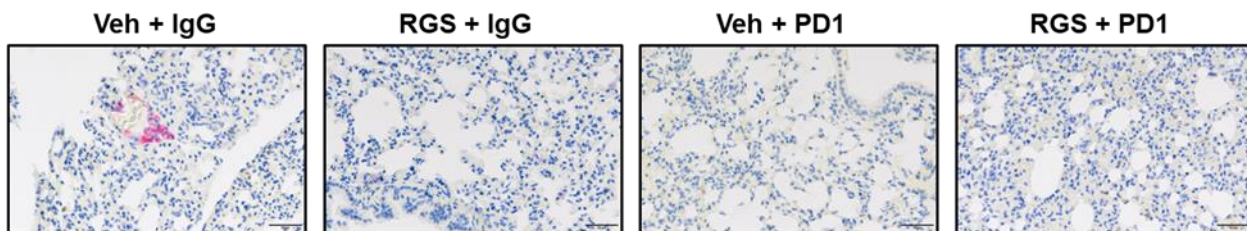

**Supplementary Figure S7. Histologic evaluation of the lungs of huNOG-EXL mice bearing PDX-3101 tumors.** The lung tissues of humanized mice demonstrated normal-appearing lung parenchyma. Immunohistochemical staining using a combined anti-human Melan A/Mart1 red stain for human melanoma cells demonstrated a small, 1mm, deposit of metastatic melanoma in the lung of a vehicle-treated mouse.

**Supplementary Table 1.** Antibodies for flow cytometry detection of human immune cells in humanized mice and human blood and mouse immune cells from wild type mice.

| Target                        | Human Panel A  | Clone    | Fluorophor    | Target                | Human Panel C | Clone           | Fluorophor       |
|-------------------------------|----------------|----------|---------------|-----------------------|---------------|-----------------|------------------|
| All leukocytes, mouse         | mouse CD45     | 30-F11   | Apc/Cy7       | All leukocytes, mouse | mouse CD45    | 30-F11          | FITC             |
| All leukocytes, human         | human CD45     | HI30     | AlexaFluor488 | All leukocytes, human | human CD45    | 2D1             | APC              |
| T cells                       | CD3            | UCHT1    | Percp/Cy5.5   | T cells               | CD3           | UCHT1           | Pac. Orange      |
| B cells                       | CD19           | HIB19    | Pe/Cy7        | B cells               | CD19          | HIB19           | BV711            |
| NK cells                      | CD56           | HCD56    | PE            | NK cells              | CD56          | 5.1H11          | Sp. NIR685       |
| T helpers                     | CD4            | RPA-T4   | BV421         | T helpers             | CD4           | SK3             | PE/Fire 640      |
| Cytotoxic T cells             | CD8            | SK1      | BV605         | Cytotoxic T cells     | CD8           | SK1             | BV510            |
| Activation                    | HLA-DR         | L243     | bv650         | Myeloid cells         | CD11b         | ICRF44          | Percp/Cy5.5      |
| Activation                    | CD38           | HIT2     | bv785         | Dendritic cells       | CD11c         | 3.9             | BV650            |
| Activation                    | CD69           | FN50     | APC           | Monocytes             | CD14          | M5E2            | BV570            |
| Viability                     | Live/Dead Aqua |          |               | PMN-MDSCs             | CD15          | HI98            | eFluor 450       |
| Target                        | Human Panel B  |          |               | Ag-presenting cells   | HLA-DR        | L243            | APC-Fire 750     |
| All leukocytes, mouse         | mouse CD45     | 30-F11   | APC/Cy7       | Macrophages           | CD206         | 15-2            | PE-Cy5           |
| All leukocytes, human         | human CD45     | HI30     | AlexaFluor488 | Regulatory T cells    | CD36          | eBioNL07 (NL07) | PerCP-eFluor 710 |
| Antigen (Ag)-presenting cells | HLA-DR         | L243     | BV650         | Viability             | Zombie NIR    |                 |                  |
| Myeloid cells                 | CD11b          | M1/70    | BV750         |                       |               |                 |                  |
| Granulocytes                  | CD66b          | 6/40c    | Pac. Blue     |                       |               |                 |                  |
| Dendritic cells               | CD11c          | Bu15     | PE            |                       |               |                 |                  |
| Dendritic cells               | CD123          | 6H6      | APC           |                       |               |                 |                  |
| Monocytes                     | CD14           | 63D3     | AlexaFluor700 |                       |               |                 |                  |
| Macrophages                   | CD64           | 10.1     | PE/Cy7        |                       |               |                 |                  |
| Macrophages                   | CD163          | GHI/61   | BV605         |                       |               |                 |                  |
| Target                        | Mouse panel    |          |               |                       |               |                 |                  |
| All leukocytes, mouse         | mouse CD45     | 104      | BUV395        |                       |               |                 |                  |
| T cells                       | TCR $\beta$    | 145-2C11 | BV510         |                       |               |                 |                  |
| Activated T cells             | CD69           | H1-2F3   | BV605         |                       |               |                 |                  |
| Myeloid cells                 | CD11b          | M1/70    | BV750         |                       |               |                 |                  |
| NK cells                      | NK1.1          | PK136    | PE-Cy7        |                       |               |                 |                  |
| B cells                       | B220           | RA3-6B2  | PE-Cy5        |                       |               |                 |                  |
